# Supplementary material for: Hyperthyroid-associated osteoporosis is exacerbated by the loss of TSH signaling
Source: JCI journal article supplement (doi:10.1172/jci63948), 2012-09-20
Supplement: sd1 [file 1]

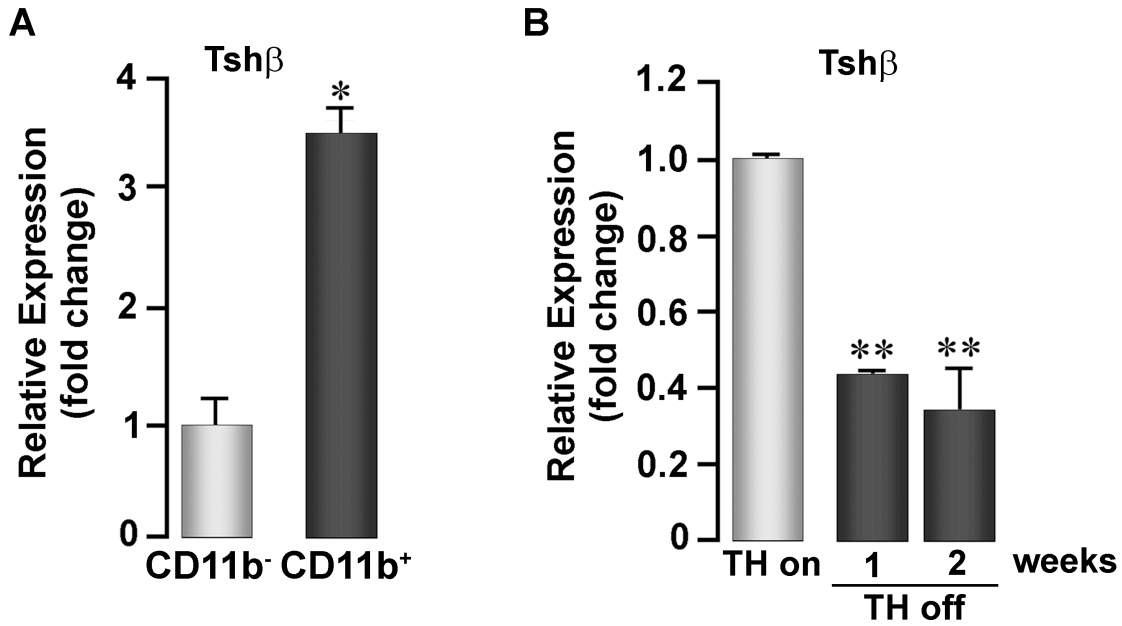

**SUPPLEMENTARY FIGURE 1**

Quantitative PCR showing the expression of *Tshβ* in FACS-sorted CD11b<sup>+</sup> and CD11b<sup>-</sup> cells isolated from bone marrow (A), as well as in whole bone marrow isolated from wild type mice on thyroid chow (TH-on), or off thyroid chow (TH-off) for 1 or 2 weeks. *Tshβ* expression is primarily restricted to the CD11b<sup>+</sup> population, and is positively regulated by thyroid hormone, so that decreasing serum T<sub>4</sub> levels in TH-off mice are associated with decreased *Tshβ* expression. \*p<0.05 with respect to CD11b<sup>-</sup> cells; \*\*p<0.01 with respect to TH-on.

**Supplementary Table 1****Implantation of 5 mg sustained release T<sub>4</sub> pellets (TH) induce hyperthyroidism**

|                           |                      | <b>+1 day</b> | <b>+21 days</b> |             |
|---------------------------|----------------------|---------------|-----------------|-------------|
|                           |                      | <b>0 mg</b>   | <b>0 mg</b>     | <b>5 mg</b> |
| <b>Tshr<sup>+/+</sup></b> | <b>T<sub>4</sub></b> | 0.6 ± 0.1     | 0.6 ± 0.4       | 13.2 ± 1.7  |
|                           | <b>TSH</b>           | 2.17 ± 0.6    | 6.29 ± 2.3      | <0.4        |
| <b>Tshr<sup>-/-</sup></b> | <b>T<sub>4</sub></b> | 0.4 ± 0.1     | 0.6 ± 0.1       | 11.2 ± 1.1  |
|                           | <b>TSH</b>           | 13.2 ± 2.5    | 14.1 ± 0.7      | <0.4        |

Shown are serum T<sub>4</sub> (µg/dL) and TSH (ng/mL) levels, measured in Tshr<sup>+/+</sup> and Tshr<sup>-/-</sup> mice after 14 days of being rendered hypothyroid by feeding with methimazole (+1 day), and 21 days after implantation with 0 mg (placebo) or 5 mg T<sub>4</sub> pellets (+21 day). Normal serum ranges: T<sub>4</sub>: 3.0 - 5.0 (µg/dL); TSH: 0.084 ± 0.02 (ng/mL)
